# Supplementary material for: Disease Susceptibility of Interspecific Cold-Hardy Grape Cultivars in Northeastern U.S.A
Source: MDPI journal article supplement (doi:10.3390/horticulturae7080216), 2021-07-30
Supplement: s1 [file s1]

# Disease susceptibility of interspecific cold-hardy grape cultivars in Northeastern U.S.A.

Ann L. Hazelrigg<sup>1</sup>, Terence L. Bradshaw<sup>2</sup>; and Gabriella S. Maia<sup>1</sup>

<sup>1</sup> University of Vermont Extension, 63 Carrigan Dr, Burlington, VT 05405, U.S.A.; ann.hazelrigg@uvm.edu

<sup>2</sup> Department of Plant & Soil Science, University of Vermont, 63 Carrigan Dr, Burlington, VT 05405, U.S.A.; terence.bradshaw@uvm.edu

\* Author to whom correspondence should be addressed.

## Supplementary Materials

**Table S1.** Horsfall-Barratt disease range used for data collection.<sup>1</sup>

| Horsfall-Barratt rating | Horsfall-Barratt percent disease range | Rating value recorded on data sheet | Percent conversion |
|-------------------------|----------------------------------------|-------------------------------------|--------------------|
| 0                       | 0                                      | 0                                   | 0                  |
| 1                       | 0-3                                    | 3                                   | 2.34               |
| 2                       | 4-6                                    | 6                                   | 4.68               |
| 3                       | 7-12                                   | 12                                  | 9.37               |
| 4                       | 13-25                                  | 25                                  | 18.75              |
| 5                       | 26-50                                  | 50                                  | 37.5               |
| 6                       | 51-75                                  | 75                                  | 62.5               |
| 7                       | 76-87                                  | 87                                  | 81.25              |
| 8                       | 88-94                                  | 94                                  | 90.63              |
| 9                       | 95-97                                  | 97                                  | 95.31              |
| 10                      | 98-99                                  | 99                                  | 97.66              |
| 11                      | 100                                    | 100                                 | 100                |

<sup>1</sup> Horsfall, J.G., Barratt, R.W. An improved grading system for measuring plant diseases. *Phytopathology* 1945, 35, 655.

**Table S2.** Weather conditions during the growing season.<sup>1</sup>

| <b>Month</b> | <b>Year</b> | <b>Avg air temp<br/>(°C)</b> | <b>Max air temp<br/>(°C)</b> | <b>Min air temp<br/>(°C)</b> | <b>Total<br/>precip<br/>(mm)</b> | <b>Total leaf<br/>wetness<br/>hours</b> | <b>RH hours ≥ 90%</b> |
|--------------|-------------|------------------------------|------------------------------|------------------------------|----------------------------------|-----------------------------------------|-----------------------|
| May          | 2018        | 15.9                         | 29.0                         | -0.2                         | 51.3                             | 87                                      | 107                   |
| June         | 2018        | 18.2                         | 32.5                         | 5.3                          | 77.7                             | 131                                     | 126                   |
| July         | 2018        | 23.7                         | 35.6                         | 9.7                          | 56.1                             | 87                                      | 59                    |
| August       | 2018        | 22.4                         | 33.7                         | 9.2                          | 58.4                             | 115                                     | 116                   |
| September    | 2018        | 17.7                         | 33.1                         | 3.2                          | 75.9                             | 123                                     | 113                   |
| Total        | 2018        | -                            | -                            | -                            | 319.4                            | 543                                     | 521                   |
| May          | 2019        | 12.1                         | 25.3                         | -0.1                         | 122.4                            | 206                                     | 86                    |
| June         | 2019        | 18.2                         | 30.8                         | 5.2                          | 117.6                            | 152                                     | 75                    |
| July         | 2019        | 23.2                         | 34.1                         | 9.8                          | 41.9                             | 66                                      | 10                    |
| August       | 2019        | 20.6                         | 31.4                         | 9.3                          | 62.7                             | 110                                     | 24                    |
| September    | 2019        | 16.1                         | 28.3                         | 3.1                          | 88.9                             | 242                                     | 14                    |
| Total        | 2019        | -                            | -                            | -                            | 433.5                            | 776                                     | 209                   |

<sup>1</sup> Weather data collected with onsite Rainwise MKII weather Station (Boothwyn, PA).
